# Supplementary material for: Distribution of feline AB blood types: a review of frequencies and its implications in the Iberian Peninsula
Source: PubMed Central journal article supplement — JFMS Open Rep. 2017 Sep 19;3(2):2055116917727693. doi: 10.1177/2055116917727693 (PMC5613844; doi:10.1177/2055116917727693), 2017-09-19
Supplement: Suplementary_information.pdf [file Suplementary_information.pdf]

| Source                                       | Country        | Breed                     | N    | A(%)  | B(%) | AB(%) |
|----------------------------------------------|----------------|---------------------------|------|-------|------|-------|
| Eyquem <i>et al.</i> 1962 <sup>10</sup>      | France         | Non-purebred              | 350  | 85.1  | 14.9 | 0.0   |
| Auer & Bell 1981 <sup>10</sup>               | Australia      | Non-purebred              | 1895 | 73.3  | 26.3 | 0.4   |
| Giger <i>et al.</i> 1991 <sup>10</sup>       | USA            | Purebred and non-purebred | 3785 | 98.1  | 1.7  | 0.1   |
| Giger <i>et al.</i> 1992 <sup>10</sup>       | Austria        | Non-purebred              | 101  | 97.0  | 3.0  | 0.0   |
| Hubler <i>et al.</i> 1993 <sup>11</sup>      | Switzerland    | Non-purebred              | 1014 | 99.6  | 0.4  | 0.0   |
| Jensen <i>et al.</i> 1994 <sup>12</sup>      | Denmark        | Non-purebred              | 105  | 98.1  | 1.9  | 0.0   |
|                                              |                | Persian                   | 56   | 96.4  | 3.6  | 0.0   |
|                                              |                | British Shorthair         | 30   | 66.7  | 33.3 | 0.0   |
|                                              |                | Abyssinian                | 20   | 100.0 | 0.0  | 0.0   |
|                                              |                | Other (various purebreds) | 33   | 90.9  | 9.1  | 0.0   |
| Knottenbelt <i>et al.</i> 1999 <sup>13</sup> | United Kingdom | Non-purebred              | 139  | 87.1  | 7.9  | 5.0   |
|                                              |                | British Shorthair         | 121  | 39.7  | 58.7 | 1.6   |
|                                              |                | Birman                    | 24   | 62.5  | 29.2 | 8.3   |
|                                              |                | Persian                   | 17   | 88.2  | 11.8 | 0.0   |
|                                              |                | Other (various purebreds) | 45   | 77.8  | 6.7  | 15.5  |
| Knottenbelt <i>et al.</i> 1999 <sup>14</sup> | United Kingdom | Non-purebred              | 43   | 83.7  | 14.0 | 2.3   |
|                                              |                | Purebred (various)        | 61   | 41.0  | 55.7 | 3.3   |
| Mylonakis <i>et al.</i> 2001 <sup>15</sup>   | Greece         | Non-purebred              | 207  | 78.3  | 20.3 | 1.4   |
| Bagdi <i>et al.</i> 2001 <sup>16</sup>       | Hungary        | Non-purebred              | 81   | 100.0 | 0    | 0.0   |
|                                              |                | Purebred (various)        | 19   | 84.2  | 15.8 | 0.0   |
| Arikan <i>et al.</i> 2003 <sup>17</sup>      | Turkey         | Turkish Angora            | 28   | 53.6  | 46.4 | 0.0   |
|                                              |                | Turkish Van               | 85   | 40.0  | 60.0 | 0.0   |
| Silvestre-Ferreira <i>et al.</i> 2004        | Spain          | Non-purebred              | 97   | 88.7  | 7.2  | 4.1   |

|                                                     |                       |                                  |            |              |             |             |
|-----------------------------------------------------|-----------------------|----------------------------------|------------|--------------|-------------|-------------|
| Silvestre-Ferreira <i>et al.</i> 2004 <sup>19</sup> | <b>Portugal</b>       | <b>Non-purebred</b>              | <b>159</b> | <b>89.3</b>  | <b>4.4</b>  | <b>6.3</b>  |
|                                                     |                       | <b>Siamese</b>                   | <b>19</b>  | <b>100.0</b> | <b>0</b>    | <b>0</b>    |
|                                                     |                       | <b>Persian</b>                   | <b>7</b>   | <b>85.7</b>  | <b>0</b>    | <b>14.3</b> |
| Malik <i>et al.</i> 2005 <sup>11</sup>              | <b>Australia</b>      | <b>Non-purebred</b>              | <b>186</b> | <b>62.4</b>  | <b>36.0</b> | <b>1.6</b>  |
|                                                     |                       | <b>Devon Rex</b>                 | <b>71</b>  | <b>45.1</b>  | <b>53.5</b> | <b>1.4</b>  |
|                                                     |                       | <b>Burmese</b>                   | <b>30</b>  | <b>93.4</b>  | <b>3.3</b>  | <b>3.3</b>  |
|                                                     |                       | <b>Abyssinian</b>                | <b>18</b>  | <b>88.9</b>  | <b>11.1</b> | <b>0.0</b>  |
|                                                     |                       | <b>Siamese/Oriental</b>          | <b>12</b>  | <b>100.0</b> | <b>0.0</b>  | <b>0.0</b>  |
|                                                     |                       | <b>Other (various purebreds)</b> | <b>35</b>  | <b>60.0</b>  | <b>37.1</b> | <b>2.9</b>  |
| Gurkan <i>et al.</i> 2005 <sup>20</sup>             | <b>Turkey</b>         | <b>Non-purebred</b>              | <b>312</b> | <b>72.8</b>  | <b>25.0</b> | <b>2.2</b>  |
| Arikan <i>et al.</i> 2006 <sup>21</sup>             | <b>Turkey</b>         | <b>Non-purebred</b>              | <b>301</b> | <b>73.1</b>  | <b>24.6</b> | <b>2.3</b>  |
| Forcada <i>et al.</i> 2007 <sup>22</sup>            | <b>England</b>        | <b>Non-purebred</b>              | <b>105</b> | <b>67.6</b>  | <b>30.5</b> | <b>1.9</b>  |
|                                                     |                       | <b>Siamese</b>                   | <b>13</b>  | <b>100.0</b> | <b>0</b>    | <b>0</b>    |
|                                                     |                       | <b>Other (various purebreds)</b> | <b>38</b>  | <b>76.3</b>  | <b>21.1</b> | <b>2.6</b>  |
| Medeiros <i>et al.</i> 2008 <sup>23</sup>           | <b>Brazil</b>         | <b>Non-purebred</b>              | <b>172</b> | <b>94.8</b>  | <b>2.9</b>  | <b>2.3</b>  |
| Gunn-Moore <i>et al.</i> 2009 <sup>24</sup>         | <b>United Kingdom</b> | <b>Bengal</b>                    | <b>100</b> | <b>100.0</b> | <b>0</b>    | <b>0</b>    |
| Zheng <i>et al.</i> 2011 <sup>25</sup>              | <b>China</b>          | <b>Non-purebred</b>              | <b>262</b> | <b>88.2</b>  | <b>11.4</b> | <b>0.4</b>  |
| Merbl <i>et al.</i> 2011 <sup>10</sup>              | <b>Israel</b>         | <b>Non-purebred</b>              | <b>213</b> | <b>69.5</b>  | <b>16.0</b> | <b>14.5</b> |
|                                                     |                       | <b>Persian</b>                   | <b>15</b>  | <b>100.0</b> | <b>0</b>    | <b>0</b>    |
|                                                     |                       | <b>Other (various purebreds)</b> | <b>14</b>  | <b>92.9</b>  | <b>7.1</b>  | <b>0</b>    |
| Marques <i>et al.</i> 2011 <sup>26</sup>            | <b>Portugal</b>       | <b>Non-purebred</b>              | <b>515</b> | <b>97.5</b>  | <b>2.1</b>  | <b>0.4</b>  |
| Mendes <i>et al.</i> 2013 <sup>27</sup>             | <b>Brazil</b>         | <b>Non-purebred</b>              | <b>164</b> | <b>98.1</b>  | <b>1.2</b>  | <b>0.7</b>  |
|                                                     |                       | <b>Other (various purebreds)</b> | <b>14</b>  | <b>100.0</b> | <b>0.0</b>  | <b>0.0</b>  |
| Proverbio <i>et al.</i> 2013 <sup>28</sup>          | <b>Italy</b>          | <b>Ragdolls</b>                  | <b>61</b>  | <b>77.1</b>  | <b>4.9</b>  | <b>18.0</b> |

|                                          |        |                           |     |       |      |      |
|------------------------------------------|--------|---------------------------|-----|-------|------|------|
| Spada <i>et al.</i> 2014 <sup>29</sup>   | Italy  | Non-purebred              | 195 | 92.3  | 5.1  | 2.6  |
|                                          |        | Maine Coon                | 75  | 100.0 | 0    | 0    |
|                                          |        | Ragdoll                   | 25  | 68.0  | 8.0  | 24.0 |
|                                          |        | Other (various purebreds) | 62  | 82.3  | 12.9 | 4.8  |
| Fosset & Blais 2014 <sup>30</sup>        | Canada | Non-purebred              | 178 | 94.4  | 5.0  | 0.6  |
|                                          |        | Purebred (various)        | 29  | 100.0 | 0    | 0    |
| Gopegui <i>et al.</i> 2016 <sup>31</sup> | Spain  | Non-purebred              | 100 | 94.0  | 5.0  | 1.0  |

---

**Table 1.** Documented feline blood type frequencies worldwide
